# Supplementary material
Source: HighWire-hosted journal article supplement (https://advances.sciencemag.org/content/suppl/2021/03/29/7.14.eabe9773)
Supplement: abe9773_SM.pdf [file abe9773_SM.pdf]

Redirecting


Redirecting you to https://advances.sciencemag.org/content/suppl/2021/03/29/7.14.eabe9773.DC1/abe9773\_SM.pdf
